# Supplementary material
Source: PubMed Central journal article supplement (PMC6895474)
Supplement: CJN.00990119SupplementaryData.pdf [file CJN.00990119SupplementaryData.pdf]

## Table of Contents

**Supplemental Table 1:** Baseline characteristics of patients receiving immune checkpoint inhibitor therapy grouped by duration of AKI

**Supplemental Table 2:** Incidence and types of concurrent immune related adverse events in patients with potential immune checkpoint inhibitor-related acute kidney injury

**Supplemental Table 3:** De-identified case summaries of patients with 'potential immune checkpoint inhibitor related AKI'.

**Supplemental Table 4A, 4B, 4C, 4D:** Events of sustained AKI, ICPI AKI and Death by eGFR group and baseline PPI use.

**Supplemental Table 5:** Incidence of 'sustained AKI' and 'potential ICPI related AKI' by year and drug type.

**Supplemental Figure 1A and 1B:** Incidence of transient AKI events by KDIGO stage and etiology of stage 2-3 transient AKI events.

**Supplemental Figure 2A, 2B.** Cumulative Incidence curve for sustained AKI and ICPI AKI by eGFR group

**Supplemental Figure 3A, 3B, 3C.** Incidence of 'any AKI', 'sustained AKI', 'ICPI AKI' by malignancy type

**Supplemental Figure 4:** Cumulative Incidence curve for sustained AKI by Vital Status

**Supplemental Table 1: Baseline characteristics of patients receiving immune checkpoint inhibitor therapy grouped by duration of AKI**

|                                        | No AKI             | Sustained AKI | Transient AKI |
|----------------------------------------|--------------------|---------------|---------------|
|                                        | Mean ± SD or N (%) |               |               |
| Number of patients                     | 847                | 82            | 87            |
| Age (years)                            | 63 ± 14            | 63 ± 12       | 64 ± 11       |
| Baseline Creatinine (mg/dL)            | 0.9 ± 0.4          | 0.9 ± 0.3     | 0.9 ± 0.3     |
| eGFR (mL/min)                          | 82 ± 22            | 85 ± 20       | 82 ± 20       |
| Male                                   | 513 (61)           | 50 (61)       | 53 (61)       |
| Female                                 | 334 (39)           | 32 (39)       | 34 (39)       |
| Race                                   |                    |               |               |
| White                                  | 766 (90)           | 76 (93)       | 78 (90)       |
| Black                                  | 15 (2)             | 0             | 4 (5)         |
| Hispanic                               | 11 (1)             | 3 (4)         | 2 (2)         |
| Asian                                  | 23 (3)             | 2 (2)         | 2 (2)         |
| Other/unknown                          | 32 (4)             | 1 (1)         | 1 (1)         |
| Cirrhosis                              | 12 (1)             | 2 (2)         | 3 (3)         |
| Hypertension*                          | 416 (49)           | 50 (61)*      | 47 (54)       |
| Diabetes                               | 143 (17)           | 15 (18)       | 13 (15)       |
| Drugs                                  |                    |               |               |
| NSAIDs                                 | 297 (35)           | 26 (32)       | 35 (40)       |
| Allopurinol                            | 61 (7)             | 6 (7)         | 7 (8)         |
| PPI*                                   | 488 (58)           | 58 (71)*      | 61 (70)       |
| H2 blockers                            | 331 (39)           | 29 (35)       | 36 (41)       |
| ACE/ARB                                | 325 (38)           | 39 (48)       | 39 (45)       |
| Baseline kidney function (eGFR group)  |                    |               |               |
| < 60 mL/min per 1.73 m <sup>2</sup>    | 149 (17)           | 10 (12)       | 10 (11)       |
| 60 - 90 mL/min per 1.73 m <sup>2</sup> | 361 (43)           | 35 (43)       | 45 (52)       |
| ≥ 90 mL/min per 1.73 m <sup>2</sup>    | 337 (40)           | 37 (45)       | 32 (37)       |
| Immune checkpoint inhibitor Class      |                    |               |               |
| PD1 agents                             | 592 (70)           | 51 (62)       | 58 (67)       |
| CTLA4 agents                           | 206 (24)           | 26 (32)       | 17 (19)       |
| PDL1 agents                            | 29 (3)             | 3 (4)         | 5 (6)         |
| Combined therapy                       | 20 (3)             | 2 (2)         | 7 (8)         |

|                                                    |          |         |         |
|----------------------------------------------------|----------|---------|---------|
| <b>Prior exposure to nephrotoxic chemotherapy*</b> | 240 (28) | 33 (40) | 36 (41) |
| <b>Malignancy</b>                                  |          |         |         |
| <b>Melanoma</b>                                    | 363 (43) | 42 (51) | 33 (38) |
| <b>Lung</b>                                        | 269 (32) | 17 (21) | 24 (28) |
| <b>Head and Neck</b>                               | 46 (5)   | 5 (6)   | 7 (8)   |
| <b>Luminal</b>                                     | 28 (3)   | 4 (5)   | 6 (7)   |
| <b>Liquid</b>                                      | 30 (4)   | 3 (4)   | 3 (3)   |
| <b>Glioblastoma multiforme</b>                     | 24 (3)   | 3 (4)   | 2 (2)   |
| <b>Hepatobiliary</b>                               | 17 (2)   | 4 (5)   | 2 (2)   |
| <b>Renal Cell Carcinoma</b>                        | 19 (2)   | 3 (3)   | 4 (5)   |
| <b>Other</b>                                       | 51 (6)   | 1 (1)   | 6 (7)   |

Legend: The baseline characteristics for patients in a cohort are shown as a % of that particular cohort. \*In univariable models comparing demographic and clinical characteristics of patients in these three cohorts, baseline proton pump inhibitor exposure ( $p<0.01$ ) and nephrotoxic chemotherapy exposure ( $p<0.01$ ) were significant. Nephrotoxic chemotherapies included carboplatin, cisplatin, oxaliplatin, gemcitabine, capecitabine, cyclophosphamide, methotrexate, topotecan, irinotecan, vemurafenib and bortezomib.

Abbreviations: AKI = acute kidney injury, eGFR = estimated glomerular filtration rate, PD1 = Programmed cell death protein 1, CTLA4 = cytotoxic T-lymphocyte associated antigen 4, PDL1 = programmed death ligand 1, Combined = ipilimumab (CTLA4) and nivolumab (PD1).

**Supplemental Table 2: Incidence and types of concurrent immune related adverse events in patients with potential immune checkpoint inhibitor-related acute kidney injury**

| Concurrent irAEs with 30 patients with ICPI-AKI | Count (%) |
|-------------------------------------------------|-----------|
| Any other irAE                                  | 26 (87%)  |
| More than 1 other irAEs                         | 13 (43%)  |
| Organs affected in the concurrent irAE: N (%)   |           |
| Thyroiditis                                     | 13 (43%)  |
| Colitis                                         | 7 (23%)   |
| Rash                                            | 6 (20%)   |
| Hepatitis                                       | 5 (17%)   |
| Pneumonitis                                     | 4 (13%)   |
| Hypophysitis                                    | 3 (10%)   |
| Adrenal insufficiency                           | 3 (10%)   |
| Pancreatitis                                    | 2 (7%)    |
| Uveitis                                         | 1 (3%)    |
| Myositis                                        | 1 (3%)    |

Legend. 'Concurrent irAE' is defined as a recognized irAE affecting an organ other than the kidney at the same time as the ICPI-AKI event occurred.

Abbreviations: ICPI-AKI = immune checkpoint inhibitor related acute kidney injury, irAE = immune related adverse event

**Supplemental Table 3: De-identified case summaries of patients with ‘potential immune checkpoint inhibitor related AKI’.**

| ID | Demographics | BL SCr (mg/dL) | AKI stage | UA                                  | Concurrent irAE                          | PPI/ NSAIDs at baseline | PPI/ NSAIDs At AKI onset | Summary                                                                                                                                                                                                                                                                  |
|----|--------------|----------------|-----------|-------------------------------------|------------------------------------------|-------------------------|--------------------------|--------------------------------------------------------------------------------------------------------------------------------------------------------------------------------------------------------------------------------------------------------------------------|
| 1  | 75 yo WF     | 0.98           | 1         | ND                                  | Colitis                                  | -/-                     | -/-                      | AKI in the context of hepatitis, colonoscopy-diagnosed autoimmune colitis and given IV steroids, then prednisone 60mg/d tapered over 6 weeks with improvement in diarrhea, LFT abnormalities, and creatinine to 1.2mg/dL.                                                |
| 2  | 75 yo WF     | 1.01           | 1         | ND                                  | Thyroiditis                              | +/+                     | +/+                      | Asymptomatic rise in SCr in the context of ICPI-induced hyperthyroidism without other hemodynamic alterations, creatinine remained elevated above baseline (1.2-1.5 range), ICPI continued until lung CA progressed.                                                     |
| 3  | 70 yo WM     | 0.72           | 2         | 0 prot<br>0-2 rbc<br>20-50 wbc      | Thyroiditis,<br>Hypophysitis             | +/+                     | +/-                      | AKI and leukocyturia in the context of hypophysitis, SCr did not normalize with IV fluids. Did not receive steroids, despite creatinine remaining elevated. Re-challenged with ICPI with rapid progression of CA and transition to hospice                               |
| 4  | 85 yo WM     | 1.04           | 2         | 0 prot<br>0-2 rbc<br>10-20 wbc      | Hepatitis                                | +/-                     | +/-                      | Presented with fever, hepatitis, and AKI. Given methylprednisolone and prednisone for 10 days. Re-challenged with ICPI 1mo later and AKI recurred, given prednisone 60mg/d with resolution of AKI to new baseline of 1.3mg/dL                                            |
| 5  | 75 yo WM     | 0.79           | 2         | ND                                  | Thyroiditis,<br>Myositis                 | +/-                     | +/-                      | AKI in the context of hypothyroidism and myositis. ICPI held for 2mo and SCr improved to 1.2mg/dL. Re-challenged with ICPI and had a second episode of AKI, treated with prednisone 40mg daily and SCr improved to 1.2mg/dL.                                             |
| 6  | 60 yo WF     | 0.46           | 1         | ND                                  | Thyroiditis,<br>Rash                     | +/-                     | -/-                      | AKI co-existing with hypothyroidism and rash attributed to ICPI. SCr did not return to prior baseline until ICPI discontinued.                                                                                                                                           |
| 7  | 70 yo WM     | 1.94           | 2         | 0 prot<br>0-2 rbc<br>10-20 wbc      | Colitis                                  | +/+                     | +/+                      | Rise in SCr to 5.3mg/dL after two doses of ICPI with new diagnosis of colitis, no improvement with IVF. Began prednisone 60mg/d, with resolution of AKI, however refractory colitis required infliximab. Re-challenged 4mo later with ICPI but cancer quickly progressed |
| 8  | 75 yo WM     | 0.78           | 1         | 0 prot<br>0-2 rbc<br>3-5 wbc        | Pneumonitis                              | +/+                     | +/-                      | AKI in the context of ICPI-induced pneumonitis, SCr did not improve with hydration, but improved with prednisone 60mg/d to near baseline.                                                                                                                                |
| 9  | 60 yo WM     | 0.86           | 1         | 0 prot,<br>0-2 rbc<br>0-2 wbc       | Thyroiditis                              | +/-                     | +/-                      | Unexplained rise in SCr, concurrently diagnosed with thyroiditis, patient continued ICPI treatment and SCr remained elevated 1.3-1.5mg/dL over the next 6 months                                                                                                         |
| 10 | 70 yo HF     | 1.26           | 2         | Tr prot<br>50-100 rbc<br>50-100 wbc | None                                     | +/+                     | +/+                      | AKI in the context of progressive metastatic cancer causing hyperbilirubinemia and AKI, treated with steroids, also had a unilateral obstruction that was relieved, patient was re-challenged with ICPI and developed worsening AKI and was transferred to hospice.      |
| 11 | 50 yo WM     | 0.87           | 1         | 0 prot,<br>0-2 rbc<br>3-5 wbc       | Thyroiditis,<br>adrenal<br>insufficiency | +/-                     | +/-                      | Unexplained AKI, given prednisone 60mg/d tapered over 6 weeks, SCr improved. Re-challenged with ICPI while still on low dose prednisone, developed pneumonitis, SCr remained elevated 1.3-1.5 range. Improved to 1mg/dL after stopping ICPI altogether                   |
| 12 | 65 yo WM     | 0.98           | 3         | 1 prot<br>>100 rbc<br>>100 wbc      | None                                     | -/-                     | -/-                      | Unexplained AKI, started dialysis, given methylprednisolone for presumed ICPI-nephritis. Patient transitioned to hospice given lack of improvement.                                                                                                                      |
| 13 | 60 yo WF     | 0.93           | 2         | 1 prot<br>0-2 rbc<br>3-5 wbc        | Pneumonitis                              | +/-                     | -/-                      | AKI in the context of concurrent pneumonitis, no improvement of SCr with IVF, slowly normalized 1 month later. Re-challenged with ICPI and developed recurrent pneumonitis and AKI, given prednisone and SCr improved to 0.7mg/dL                                        |
| 14 | 75 yo WM     | 1.04           | 2         | 0 prot<br>0-2 rbc                   | Dermatitis                               | -/-                     | -/-                      | AKI in the context of ICPI-associated rash. No improvement with IVF. Started on prednisone 80mg daily, tapered over 6 weeks, AKI resolved, but SCr rose once                                                                                                             |

|    |          |      |   |                                    |                                                         |     |     |                                                                                                                                                                                                                                                                              |
|----|----------|------|---|------------------------------------|---------------------------------------------------------|-----|-----|------------------------------------------------------------------------------------------------------------------------------------------------------------------------------------------------------------------------------------------------------------------------------|
|    |          |      |   | 0-2 wbc                            |                                                         |     |     | prednisone was discontinued, restarted prednisone 10mg/d and SCr remained in 1.2mg/dL range.                                                                                                                                                                                 |
| 15 | 75 yo WF | 0.61 | 1 | ND                                 | Hypophysitis                                            | +/- | +/- | Asymptomatic rise in SCr to in the context of diagnosis of hypophysitis, without changes in PO intake or hemodynamic instability, AKI resolved on steroids and infliximab.                                                                                                   |
| 16 | 30 yo HM | 0.57 | 1 | 0 prot<br>0-2 rbc<br>0-2 wbc       | Thyroiditis                                             | +/+ | -/- | Asymptomatic rise in SCr at the time of diagnosis of ICPI-related hypothyroidism without any associated changes in oral intake or new nephrotoxin exposure.                                                                                                                  |
| 17 | 55 yo WF | 0.76 | 3 | 0 prot<br>0-2 rbc<br>3-5 wbc       | Thyroiditis,<br>Pancreatitis                            | +/+ | +/- | AKI seen by nephrologist and diagnosed AIN (WBC clumps on sediment and lack of alternative cause). Slowly improved to 1.1 in 6 weeks with holding CPI, PPI and TMP-SMX. Also received dexamethasone 3mg BID. Not re-challenged with ICPI.                                    |
| 18 | 65 yo WM | 0.63 | 1 | ND                                 | Thyroiditis,<br>Rash, AI,<br>Pancreatitis               | +/- | +/- | AKI in the setting of thyroiditis, pancreatitis, rash. AKI persisted despite IVF. Treatment held with improvement in SCr. ICPI re-challenge led to a second AKI episode and new adrenal insufficiency. AKI resolved with prednisone 5mg/d.                                   |
| 19 | 65 yo WM | 0.83 | 2 | 1 prot<br>20-50 rbc<br>5-10 wbc    | Hepatitis                                               | -/+ | +/+ | AKI in the setting of recent diagnosis of ICPI-induced hepatitis, treated with prednisone 60mg/d. Readmitted with gastroenteritis, worsening AKI and patient transitioned to hospice.                                                                                        |
| 20 | 55 yo WF | 0.70 | 1 | Tr prot<br>0-2 rbc<br>50-100 wbc   | Colitis,<br>Thyroiditis,<br>Adrenal<br>insufficiency    | +/+ | +/- | AKI occurring at the time of diagnosis of pathologically confirmed ICPI-associated colitis, first episode AKI resolved with prednisone 50mg daily. Re-challenged two months later and developed hypothyroidism, AKI and adrenal insufficiency as a part of terminal decline. |
| 21 | 35 yo WF | 0.72 | 1 | ND                                 | Thyroiditis                                             | +/+ | +/+ | AKI in the context of concurrent diagnosis of hypothyroidism, ICPI stopped due to cancer progression and creatinine normalized to near baseline.                                                                                                                             |
| 22 | 75 yo WM | 0.70 | 3 | Tr prot<br>20-50 rbc 20-<br>50 wbc | None                                                    | +/- | -/- | Unexplained rise in creatinine, nephrologist saw WBC casts and initiated high-dose steroids for AIN, but patient died of septic shock.                                                                                                                                       |
| 23 | 65 yo WM | 0.66 | 1 | 1 prot<br>0-2 rbc<br>0-2 wbc       | Colitis, Rash                                           | +/- | +/- | AKI in the context of ICPI-associated rash, treated with prednisone 60mg daily, rapidly tapered, with resolution of rash and improvement in AKI. Re-challenged with ICPI and developed rash, AKI, transitioned to hospice.                                                   |
| 24 | 75 yo BM | 1.20 | 3 | 1 prot<br>>100 rbc 10-<br>20 wbc   | Colitis                                                 | -/- | -/- | Admitted with AKI, confusion, and diarrhea. Colonoscopy showed ICPI-associated colitis. No improvement with IVF. Started on solumedrol 1G daily and SCr and colitis recovered quickly. Re-challenged 3mo later but after 1 cycle cancer progressed.                          |
| 25 | 60 yo WM | 0.77 | 2 | 0 prot<br>0-2 rbc<br>3-5 wbc       | Thyroiditis,<br>Hepatitis,<br>Rash                      | +/+ | +/+ | Unexplained rise in SCr, NSAIDs stopped and given IVF, SCr continued to rise peaking at 2.19. AKI attributed to ICPI; therapy discontinued indefinitely with resolution of AKI                                                                                               |
| 26 | 60 yo WF | 0.70 | 2 | 0 prot<br>0-2 rbc<br>0-2 wbc       | Colitis,<br>Uveitis,<br>Hepatitis                       | -/- | +/- | Admitted due to colitis, uveitis, and hepatitis attributed to ICPI therapy. Unexplained AKI despite supportive measures, transitioned to hospice.                                                                                                                            |
| 27 | 70 yo WM | 0.88 | 3 | 0 prot<br>0-2 rbc<br>5-10 wbc      | Colitis,<br>Pneumonitis,<br>Dermatitis,<br>Hypophysitis | +/+ | +/- | AKI in the context of multiple other irAEs, no improvement with IVF, given prednisone 60mg daily, tapered over 10 weeks, with improvement in SCr to 1.2mg/dL, resumed ICPI with another AKI event. Baseline never fully recovered.                                           |
| 28 | 60 yo WF | 1.46 | 2 | 0 prot<br>3-5 rbc<br>0-2 wbc       | None                                                    | -/- | -/- | AKI, underwent kidney biopsy showing AIN with TMA, treated with prednisone 60mg daily with slow improvement to baseline SCr over 3mo.                                                                                                                                        |
| 29 | 75 yo WM | 0.97 | 1 | 1 prot<br>0-2 rbc<br>0-2 wbc       | Pneumonitis                                             | +/+ | +/- | Elevated SCr, initially rose after a CT with contrast but remained elevated for > 1 week, patient received prednisone 60mg/d prescribed for pneumonitis (detected on CT scan). Re-challenged with ICPI 4mo later with another AKI event, again treated with steroids.        |
| 30 | 50 yo WM | 0.91 | 1 | 1 prot<br>0-2 rbc<br>0-2 wbc       | Hepatitis,<br>Thyroiditis                               | +/- | -/- | Unexplained rise in SCr in the context of new diagnosis of thyroiditis, treated with prednisone 60mg/d followed by 4-week taper with resolution of AKI.                                                                                                                      |

Legend: PPI/NSAID use at baseline assessed at the time of ICPI initiation: 77/43%. PPI/NSAID use at AKI onset based on the medication list documented by the oncologist at the time of ICPI-related AKI: 67/20%. To protect confidentiality, the ages of patients have been rounded to the nearest 5-year landmarks.

Abbreviations: WM = white male, WF = white female, HM = Hispanic male, HF = Hispanic Female; BM = Black male, yo = years old, mo = months, SCr = serum creatinine, ICPI = immune checkpoint inhibitor, prot = protein, wbc = white blood cells, rbc = red blood cells, AIN = acute interstitial nephritis, irAE = immune related adverse event, AI = adrenal insufficiency, PPI – proton pump inhibitor, NSAIDS = non-steroidal anti-inflammatory drugs, TMP-SMX = Bactrim, TMA = thrombotic microangiopathy, CT = computed tomography.

**Supplemental Table 4A: Events of sustained AKI and Death by eGFR group**

| eGFR<br>(mL/min<br>per 1.73<br>m <sup>2</sup> ) | Events (N)     | Follow-up (month) |     |     |     |     |     |     |     |     |     |     |     |     |
|-------------------------------------------------|----------------|-------------------|-----|-----|-----|-----|-----|-----|-----|-----|-----|-----|-----|-----|
|                                                 |                | Baseline          | 1   | 2   | 3   | 4   | 5   | 6   | 7   | 8   | 9   | 10  | 11  | 12  |
| > 90                                            | Sustained AKI  | 0                 | 4   | 9   | 11  | 3   | 0   | 2   | 1   | 4   | 1   | 1   | 1   | 0   |
|                                                 | Death          | 0                 | 48  | 41  | 28  | 11  | 20  | 11  | 15  | 10  | 10  | 2   | 5   | 9   |
|                                                 | Free of events | 406               | 354 | 304 | 265 | 251 | 231 | 218 | 202 | 188 | 177 | 174 | 168 | 159 |
| 60 - 90                                         | Sustained AKI  | 0                 | 9   | 3   | 5   | 1   | 5   | 7   | 1   | 1   | 0   | 1   | 0   | 2   |
|                                                 | Death          | 0                 | 35  | 38  | 23  | 18  | 17  | 20  | 14  | 16  | 13  | 9   | 6   | 10  |
|                                                 | Free of events | 441               | 397 | 356 | 328 | 309 | 287 | 260 | 245 | 228 | 215 | 205 | 199 | 187 |
| < 60                                            | Sustained AKI  | 0                 | 2   | 3   | 1   | 1   | 2   | 1   | 0   | 0   | 0   | 0   | 0   | 0   |
|                                                 | Death          | 0                 | 20  | 16  | 5   | 10  | 11  | 8   | 4   | 4   | 8   | 1   | 1   | 2   |
|                                                 | Free of events | 169               | 147 | 128 | 122 | 111 | 98  | 89  | 85  | 81  | 73  | 72  | 71  | 69  |
| All                                             | Sustained AKI  | 0                 | 15  | 15  | 17  | 5   | 7   | 10  | 2   | 5   | 1   | 2   | 1   | 2   |
|                                                 | Death          | 0                 | 103 | 95  | 56  | 39  | 48  | 39  | 33  | 30  | 31  | 12  | 12  | 21  |
|                                                 | Free of events | 1016              | 898 | 788 | 715 | 671 | 616 | 567 | 532 | 497 | 465 | 451 | 438 | 415 |

**Supplemental Table 4B: Events of ICPI AKI and Death by eGFR group**

| eGFR<br>(mL/min<br>per 1.73<br>m <sup>2</sup> ) | Events (N)     | Follow-up (month) |     |     |     |     |     |     |     |     |     |     |     |     |
|-------------------------------------------------|----------------|-------------------|-----|-----|-----|-----|-----|-----|-----|-----|-----|-----|-----|-----|
|                                                 |                | Baseline          | 1   | 2   | 3   | 4   | 5   | 6   | 7   | 8   | 9   | 10  | 11  | 12  |
| > 90                                            | ICPI AKI       | 0                 | 1   | 2   | 7   | 3   | 0   | 0   | 0   | 1   | 0   | 0   | 0   | 0   |
|                                                 | Death          | 0                 | 49  | 45  | 31  | 12  | 22  | 12  | 15  | 12  | 11  | 2   | 6   | 11  |
|                                                 | Free of events | 406               | 356 | 309 | 271 | 256 | 234 | 222 | 207 | 194 | 183 | 181 | 175 | 164 |
| 60 - 90                                         | ICPI AKI       | 0                 | 1   | 1   | 2   | 0   | 2   | 2   | 0   | 0   | 0   | 0   | 0   | 2   |
|                                                 | Death          | 0                 | 40  | 40  | 26  | 19  | 19  | 21  | 15  | 18  | 13  | 10  | 7   | 10  |
|                                                 | Free of events | 441               | 400 | 359 | 331 | 312 | 291 | 268 | 253 | 235 | 222 | 212 | 205 | 193 |
| < 60                                            | ICPI AKI       | 0                 | 1   | 2   | 0   | 1   | 2   | 0   | 0   | 0   | 0   | 0   | 0   | 0   |
|                                                 | Death          | 0                 | 20  | 16  | 6   | 12  | 11  | 9   | 4   | 4   | 8   | 1   | 1   | 2   |
|                                                 | Free of events | 169               | 148 | 130 | 124 | 111 | 98  | 89  | 85  | 81  | 73  | 72  | 71  | 69  |
| All                                             | ICPI AKI       | 0                 | 3   | 5   | 9   | 4   | 4   | 2   | 0   | 1   | 0   | 0   | 0   | 2   |
|                                                 | Death          | 0                 | 109 | 101 | 63  | 43  | 52  | 42  | 34  | 34  | 32  | 13  | 14  | 23  |
|                                                 | Free of events | 1016              | 904 | 798 | 726 | 679 | 623 | 579 | 545 | 510 | 478 | 465 | 451 | 426 |

**Supplemental Table 4C: Events of Sustained AKI and Death by baseline PPI use**

| Baseline PPI use | Events (N)     | Follow-up (month) |     |     |     |     |     |     |     |     |     |     |     |     |
|------------------|----------------|-------------------|-----|-----|-----|-----|-----|-----|-----|-----|-----|-----|-----|-----|
|                  |                | Baseline          | 1   | 2   | 3   | 4   | 5   | 6   | 7   | 8   | 9   | 10  | 11  | 12  |
| Yes              | Sustained AKI  | 0                 | 11  | 8   | 12  | 4   | 4   | 8   | 1   | 4   | 1   | 2   | 1   | 2   |
|                  | Death          | 0                 | 72  | 61  | 30  | 23  | 32  | 24  | 17  | 19  | 18  | 5   | 8   | 9   |
|                  | Free of events | 607               | 524 | 455 | 413 | 386 | 350 | 318 | 300 | 277 | 258 | 251 | 242 | 231 |
| No               | Sustained AKI  | 0                 | 4   | 7   | 5   | 1   | 3   | 2   | 1   | 1   | 0   | 0   | 0   | 0   |
|                  | Death          | 0                 | 31  | 34  | 26  | 16  | 16  | 15  | 16  | 11  | 13  | 7   | 4   | 12  |
|                  | Free of events | 409               | 374 | 333 | 302 | 285 | 266 | 249 | 232 | 220 | 207 | 200 | 196 | 184 |
| All              | Sustained AKI  | 0                 | 15  | 15  | 17  | 5   | 7   | 10  | 2   | 5   | 1   | 2   | 1   | 2   |
|                  | Death          | 0                 | 103 | 95  | 56  | 39  | 48  | 39  | 33  | 30  | 31  | 12  | 12  | 21  |
|                  | Free of events | 1016              | 898 | 788 | 715 | 671 | 616 | 567 | 532 | 497 | 465 | 451 | 438 | 415 |

**Supplemental Table 4D: Events of ICPI AKI and Death by baseline PPI use**

| Baseline PPI use | Events (N)     | Follow-up (month) |     |     |     |     |     |     |     |     |     |     |     |     |
|------------------|----------------|-------------------|-----|-----|-----|-----|-----|-----|-----|-----|-----|-----|-----|-----|
|                  |                | Baseline          | 1   | 2   | 3   | 4   | 5   | 6   | 7   | 8   | 9   | 10  | 11  | 12  |
| Yes              | ICPI AKI       | 0                 | 3   | 3   | 7   | 4   | 1   | 2   | 0   | 1   | 0   | 0   | 0   | 2   |
|                  | Death          | 0                 | 77  | 64  | 34  | 26  | 34  | 26  | 17  | 23  | 18  | 6   | 10  | 11  |
|                  | Free of events | 607               | 527 | 460 | 419 | 389 | 354 | 326 | 309 | 285 | 267 | 261 | 251 | 238 |
| No               | ICPI AKI       | 0                 | 0   | 2   | 2   | 0   | 3   | 0   | 0   | 0   | 0   | 0   | 0   | 0   |
|                  | Death          | 0                 | 32  | 37  | 29  | 17  | 18  | 16  | 17  | 11  | 14  | 7   | 4   | 12  |
|                  | Free of events | 409               | 377 | 338 | 307 | 290 | 269 | 253 | 236 | 225 | 211 | 204 | 200 | 188 |
| All              | ICPI AKI       | 0                 | 3   | 5   | 9   | 4   | 4   | 2   | 0   | 1   | 0   | 0   | 0   | 2   |
|                  | Death          | 0                 | 109 | 101 | 63  | 43  | 52  | 42  | 34  | 34  | 32  | 13  | 14  | 23  |
|                  | Free of events | 1016              | 904 | 798 | 726 | 679 | 623 | 579 | 545 | 510 | 478 | 465 | 451 | 426 |

Legend (Tables 5A, 5B, 5C, 5D): Cumulative incidence curves for sustained AKI and ICPI AKI accounting for the competing risk of death are provided in figures 3 and 4. The breakdown by eGFR group and baseline PPI use is provided in these tables. Data was censored at the time of death, loss of follow-up, or at the end of the 12-month observation period, whichever happened first.

Abbreviation: ICPI = immune checkpoint inhibitor, eGFR = estimated glomerular filtration rate, PPI = proton pump inhibitor.

**Supplemental Table 5: Incidence of ‘sustained AKI’ and ‘potential ICPI related AKI’ by year and drug type.**

| Year of ICPI administration     | CTLA4           | PD1             | PDL1          | Combined (CTLA4/PD1) | Incidence of sustained AKI | Incidence of ICPI-AKI |
|---------------------------------|-----------------|-----------------|---------------|----------------------|----------------------------|-----------------------|
| Number of patients (percentage) |                 |                 |               |                      | Percentage                 | Percentage            |
| <b>Overall</b>                  | <b>249 (25)</b> | <b>701 (69)</b> | <b>37 (3)</b> | <b>29 (3)</b>        | <b>8.1</b>                 | <b>3</b>              |
| <b>2011</b>                     | 31 (97)         | 1 (3)           | 0             | 0                    | 6.3                        | 3.1                   |
| <b>2012</b>                     | 57 (93)         | 4 (7)           | 0             | 0                    | 14.8                       | 6.6                   |
| <b>2013</b>                     | 52 (58)         | 38 (42)         | 0             | 0                    | 5.6                        | 2.2                   |
| <b>2014</b>                     | 56 (52)         | 50 (47)         | 1 (1)         | 0                    | 14                         | 7.5                   |
| <b>2015</b>                     | 42 (15)         | 227 (81)        | 3 (1)         | 8 (3)                | 6.4                        | 1.4                   |
| <b>2016</b>                     | 11 (3)          | 381 (85)        | 33 (7)        | 21 (5)               | 7.4                        | 2.5                   |

Legend: There was no statistically significant changes in the rates of sustained AKI or ICPI-related AKI by year of ICPI administration. PD1 inhibitors were much more commonly used starting 2015, while the use of CTLA4 inhibitors declined.

Abbreviations: AKI = acute kidney injury, eGFR = estimated glomerular filtration rate, PD1 = Programmed cell death protein 1, CTLA4 = cytotoxic T-lymphocyte associated antigen 4, PDL1 = programmed death ligand 1, Combined = ipilimumab (CTLA4) and nivolumab (PD1).

**Supplemental Figure 1A and 1B: Incidence of transient AKI events by KDIGO stage and etiology of stage 2-3 transient AKI events.**

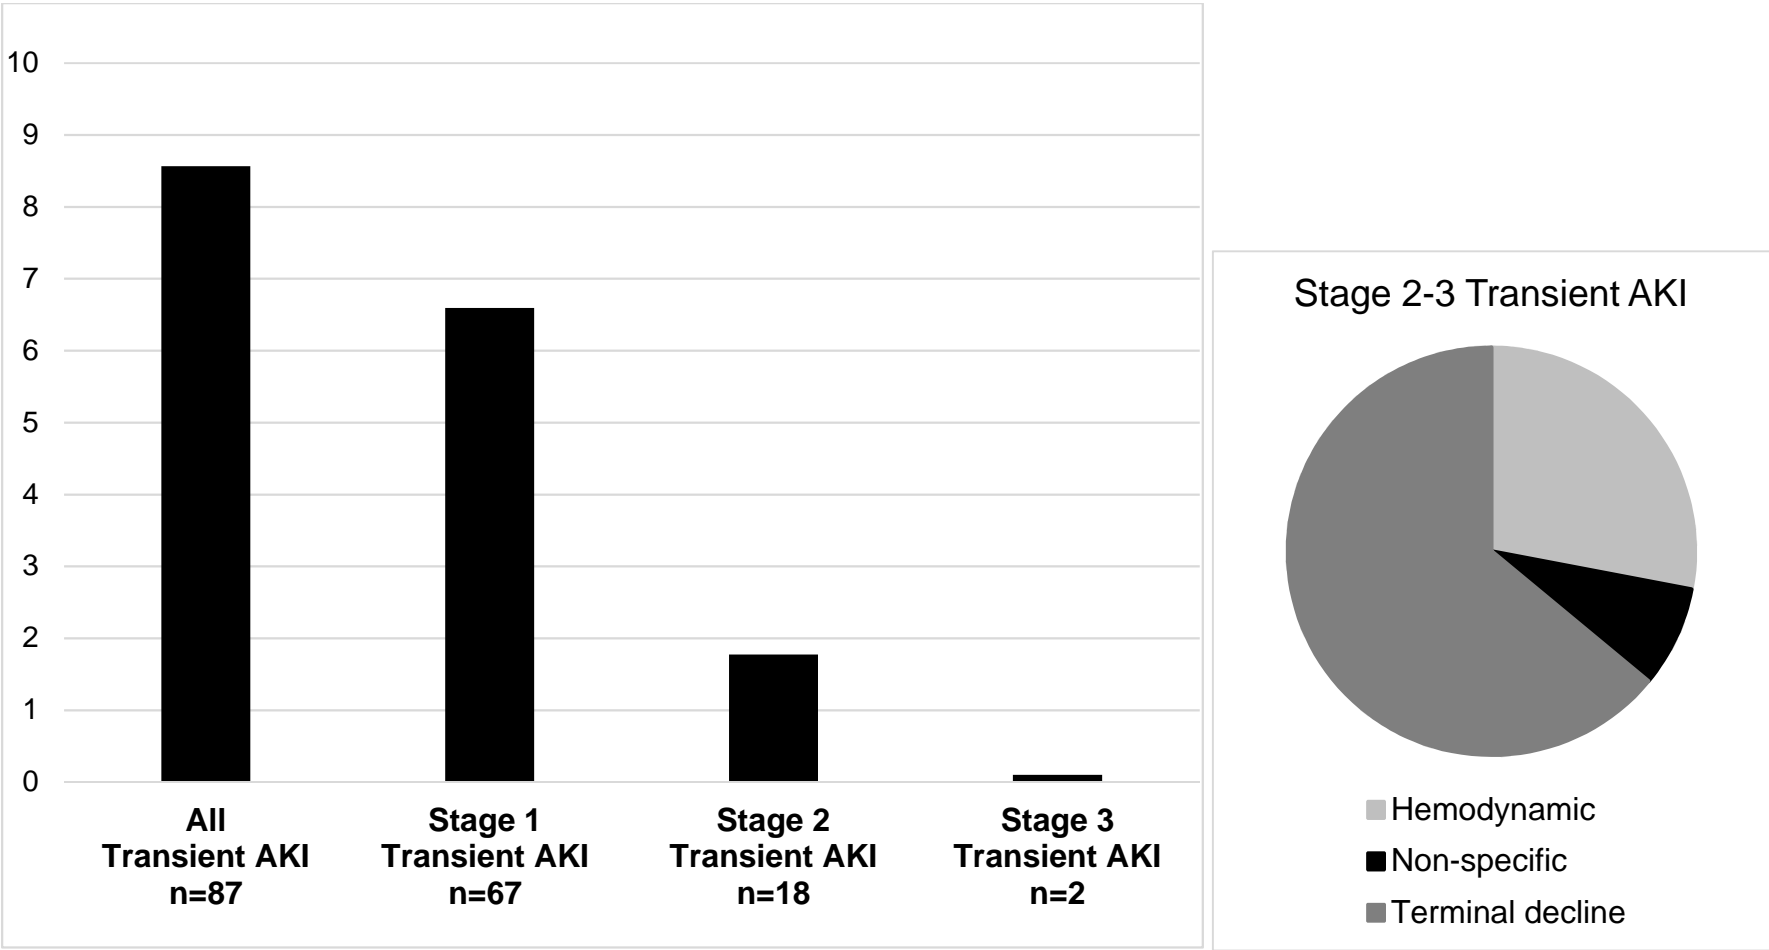

Figure 1 Legend: (A) 87 patients (8.6% of the total cohort N=1016) experienced a transient AKI event lasting  $\leq 48$  hours within 12 months of immune checkpoint inhibitor start date. Of these events, 67 (6.6%) met criteria for Stage 1 AKI (1.5-2 times the baseline creatinine), 18 (1.8%) had Stage 2 AKI (2-3 times the baseline creatinine) and 2 (0.2%) had Stage 3 AKI ( $>3$  times the baseline creatinine). (B) Out of the 25 Stage 2-3 events (in 20

patients), majority of the events were part of terminal decline (64%, n=16), while others were due to hemodynamic causes (28%, n=7) or were of undetermined cause (8%, n=2).

Supplemental Figure 2A. Cumulative Incidence curve for sustained AKI by eGFR group

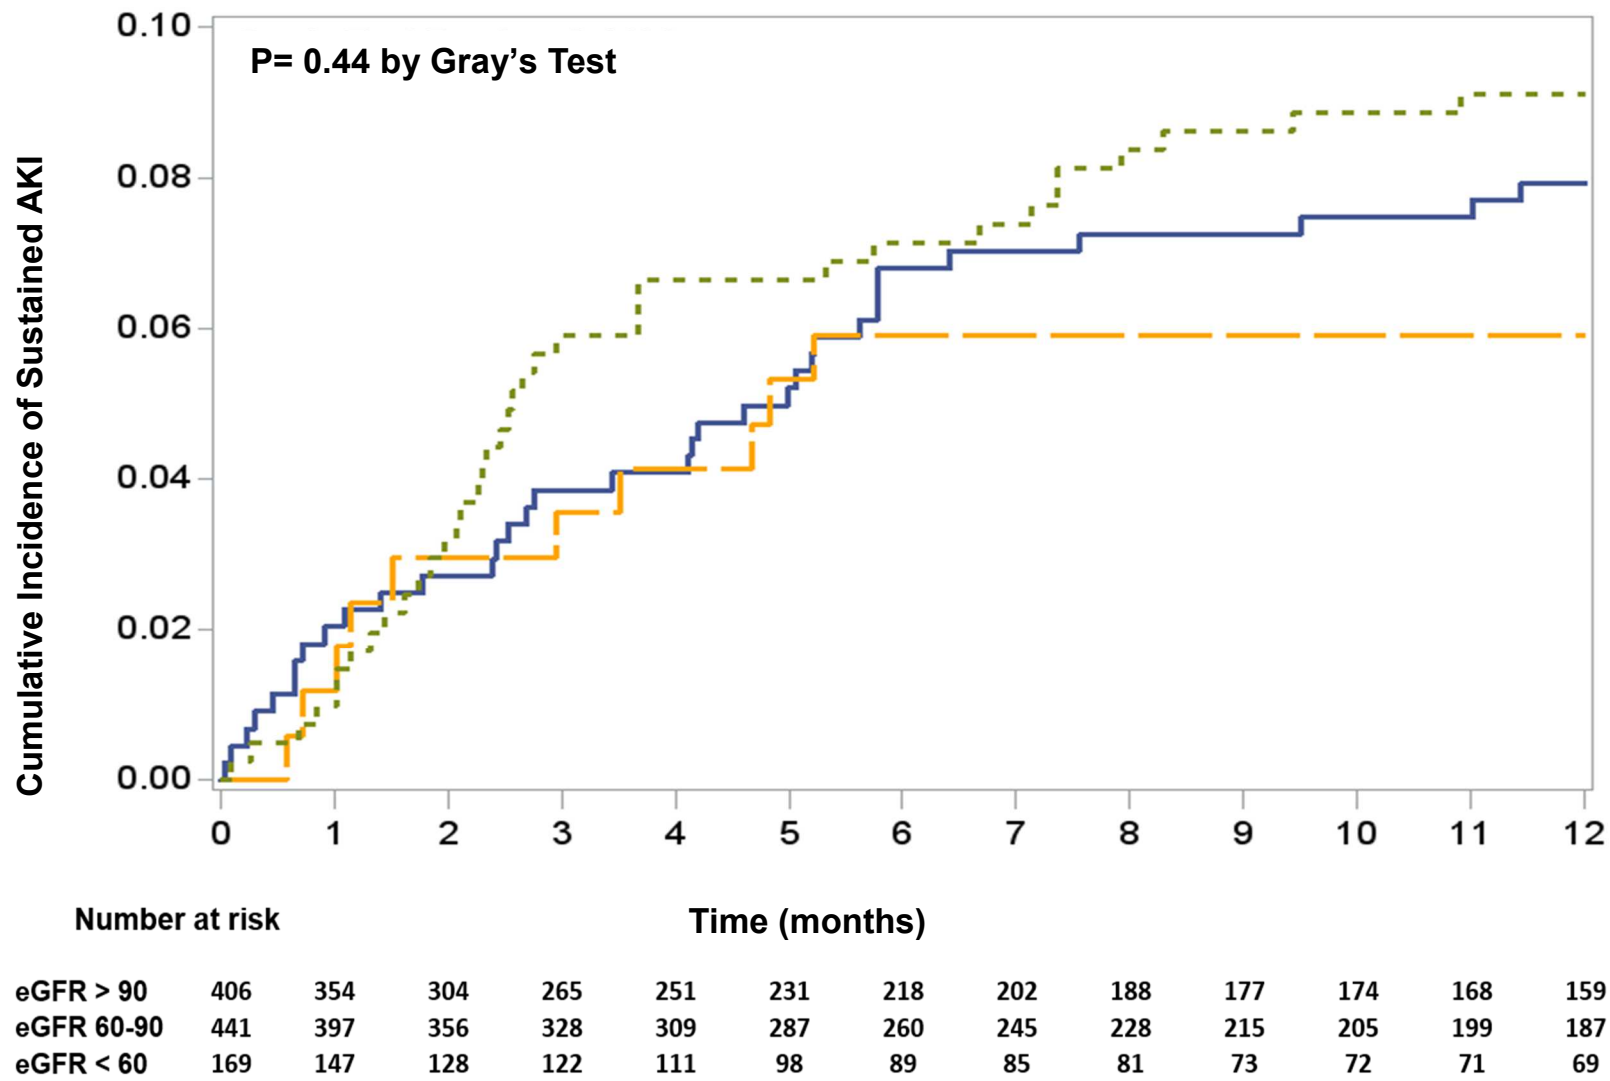

Legend: There was no significant difference in the cumulative incidence of sustained AKI by baseline eGFR group. Patients were censored at the time of sustained AKI or their last serum creatinine measurement. The breakdown of events by sustained AKI and death for each group are provided in supplemental table 5A. Breakdown of events (death, AKI) is provided in supplemental table 5A. Abbreviation: AKI = Acute Kidney Injury.

**Supplemental Figure 2B. Cumulative Incidence curve for potential immune checkpoint inhibitor-related AKI by eGFR group**

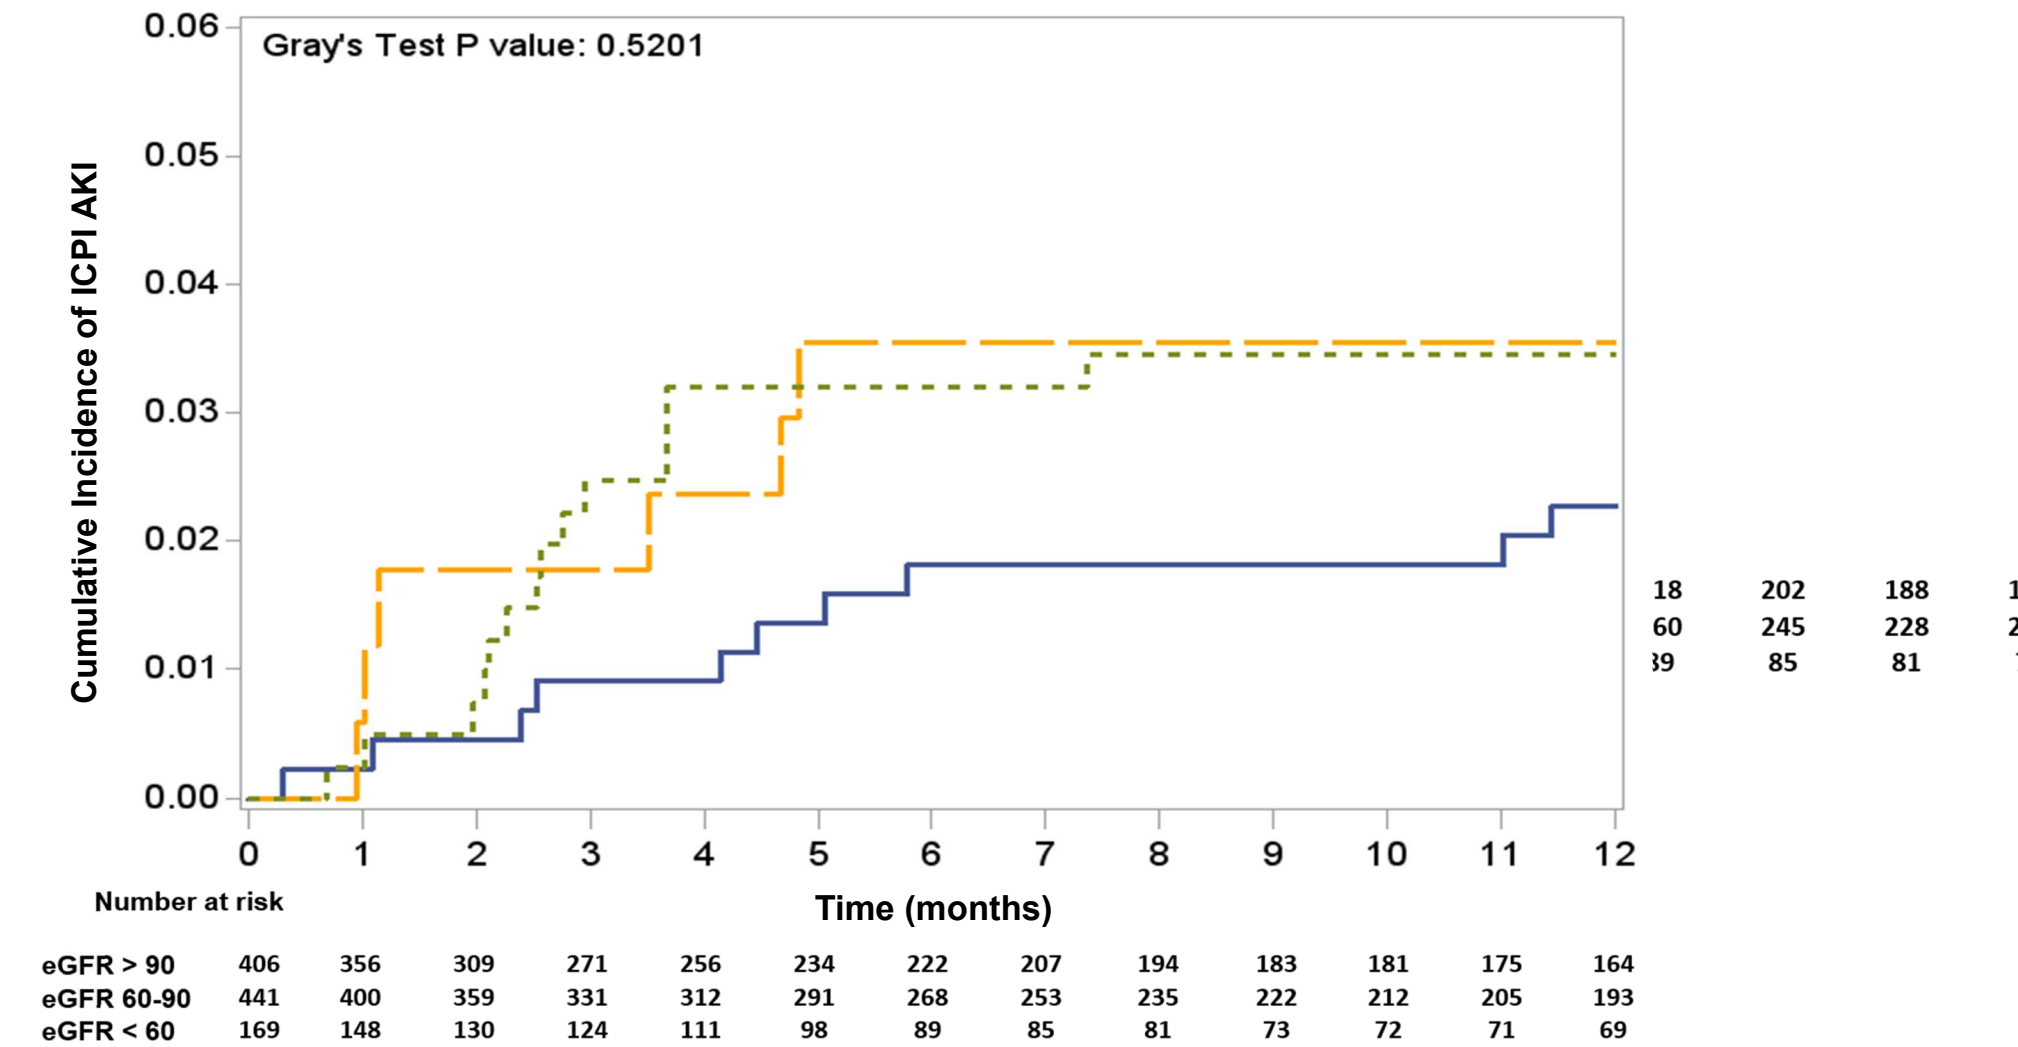

Legend: There was no significant difference in the cumulative incidence of immune checkpoint inhibitor-related AKI by baseline eGFR group. Data was censored at the time of death, loss of follow-up, or at the end of the 12-month observation period, whichever happened first. Breakdown of events (death, AKI) is provided in supplemental table 5B. Abbreviation: AKI = Acute Kidney Injury

Supplemental Figure 3A. Incidence of ‘any AKI’ by malignancy type

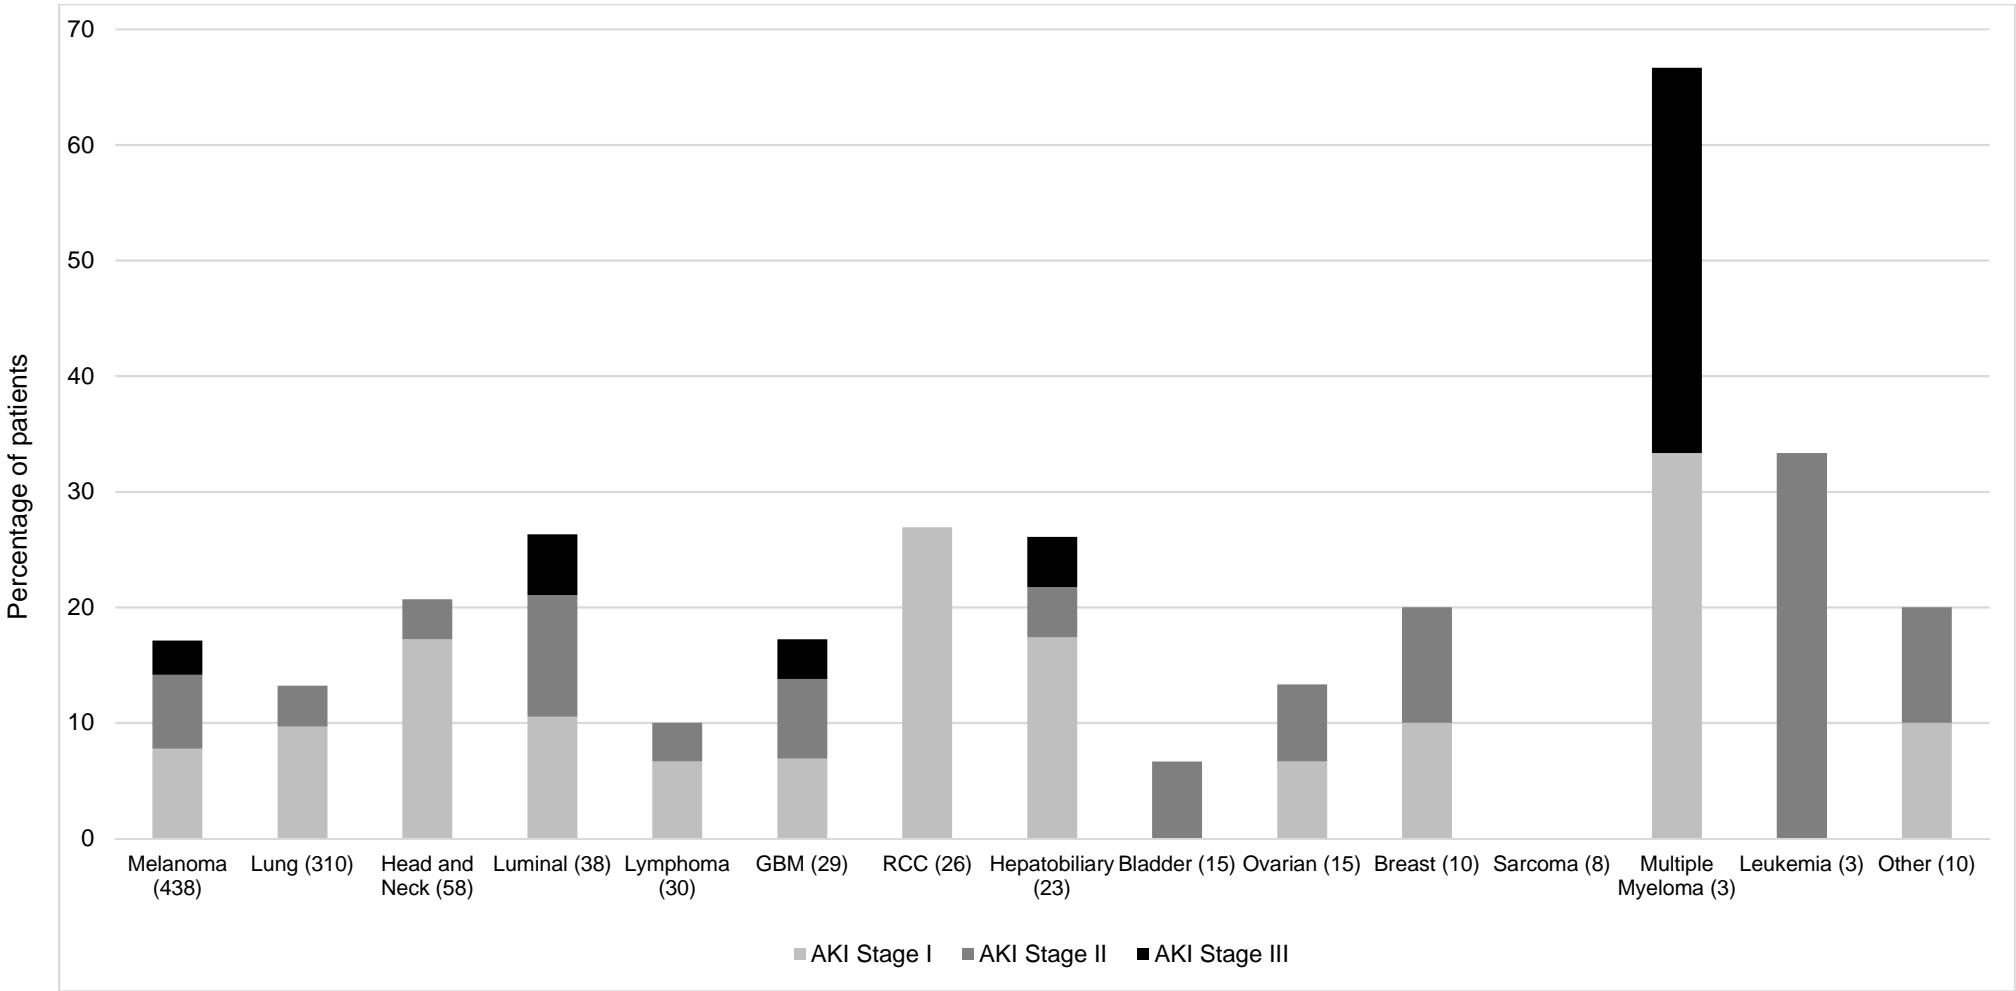

Legend: Frequency and KDIGO grades of ‘any AKI’ events by malignancy type. Melanoma 17.1%, Lung 13.2%, Head and Neck 20.7%, Luminal (gastrointestinal) 26.3%, Lymphoma 10%, GBM= glioblastoma multiforme 17.2%, RCC = renal cell carcinomas 26.9%, Hepatobiliary including

hepatocellular carcinoma and cholangiocarcinoma 26%, Bladder cancer 6.7%, Ovarian 13.3%, Breast 20%, Multiple myeloma 66.7%, Leukemia 33.3%. There were no AKI events in sarcomas. Other tumors (4 pancreatic, 4 cervical, 1 squamous cell skin, 1 endometrial) had an incidence of 20%. Abbreviation: KDIGO = Kidney Disease Improving Global Outcomes

Supplemental Figure 3B. Incidence of ‘sustained AKI’ by malignancy type

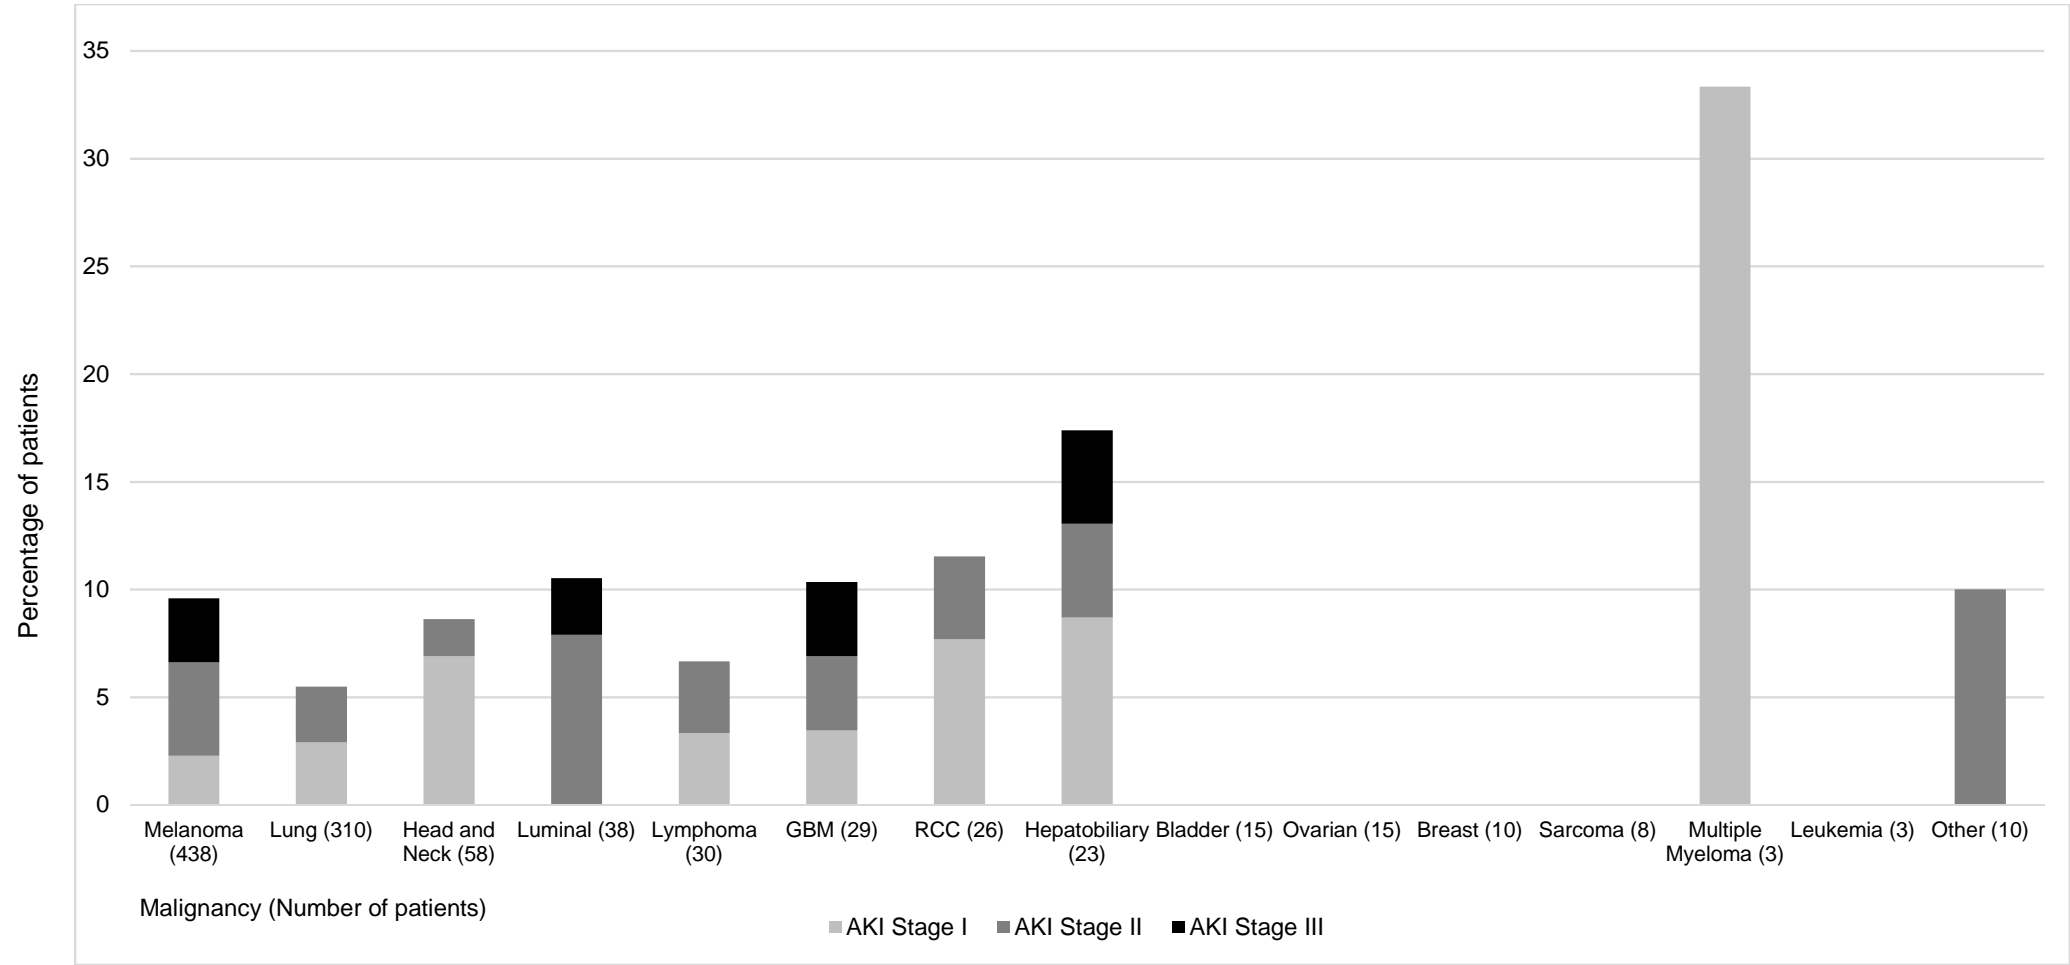

Legend: Frequency and KDIGO grades of ‘sustained AKI’ events by malignancy type. Melanoma 9.6%, Lung 5.5%, Head and Neck 8.6%, Luminal (gastrointestinal) 10.5%, Lymphoma 6.7%, GBM= glioblastoma multiforme 10.3%, RCC = renal cell carcinomas 11.5%, Hepatobiliary including

hepatocellular carcinoma and cholangiocarcinoma 17.4%, multiple myeloma 33.3%, Bladder cancer, breast cancer, ovarian cancer, leukemias and sarcomas had no cases of sustained AKI. Other tumors (4 pancreatic, 4 cervical, 1 squamous cell skin, 1 endometrial) had an incidence of 10%.

Abbreviation: KDIGO = Kidney Disease Improving Global Outcomes

### **Supplemental Figure 3C. Incidence of ‘potential ICPI-related AKI’ by malignancy type**

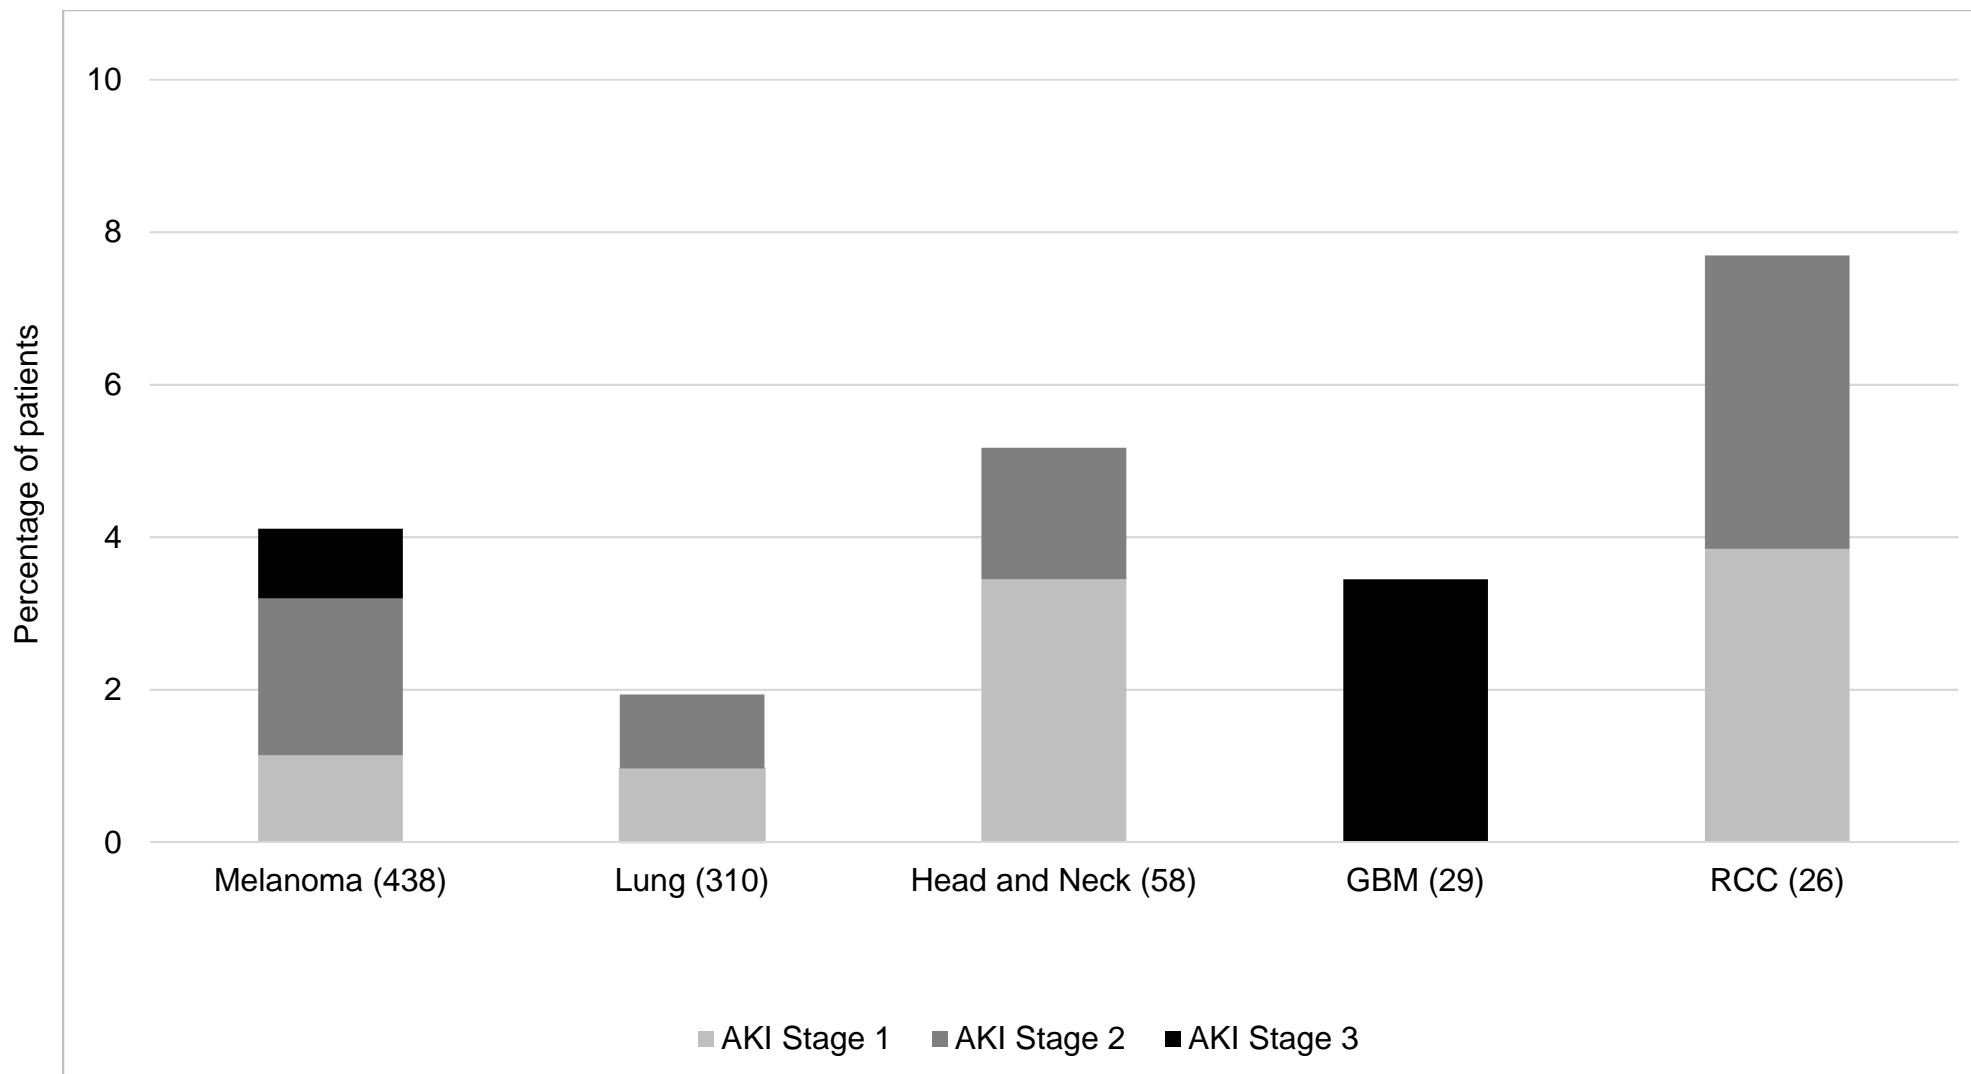

Legend: Frequency and KDIGO grades of 'ICPI-related AKI' events by malignancy type. Melanoma 4.1%, Lung 1.9%, Head and Neck 5.1%, GBM= glioblastoma multiforme 3.5%, RCC = renal cell carcinomas 7.7%; Other types of malignancies [Lymphoma, luminal, hepatobiliary including hepatocellular carcinoma and cholangiocarcinoma, bladder cancer, multiple myeloma, breast cancer, ovarian cancer, leukemia, sarcomas, pancreatic, cervical, skin and endometrial] had no cases of ICPI-related AKI.

Abbreviation: ICPI = Immune checkpoint inhibitor, KDIGO = Kidney Disease Improving Global Outcomes

**Supplemental Figure 4: Cumulative Incidence curve for sustained AKI by Vital Status**

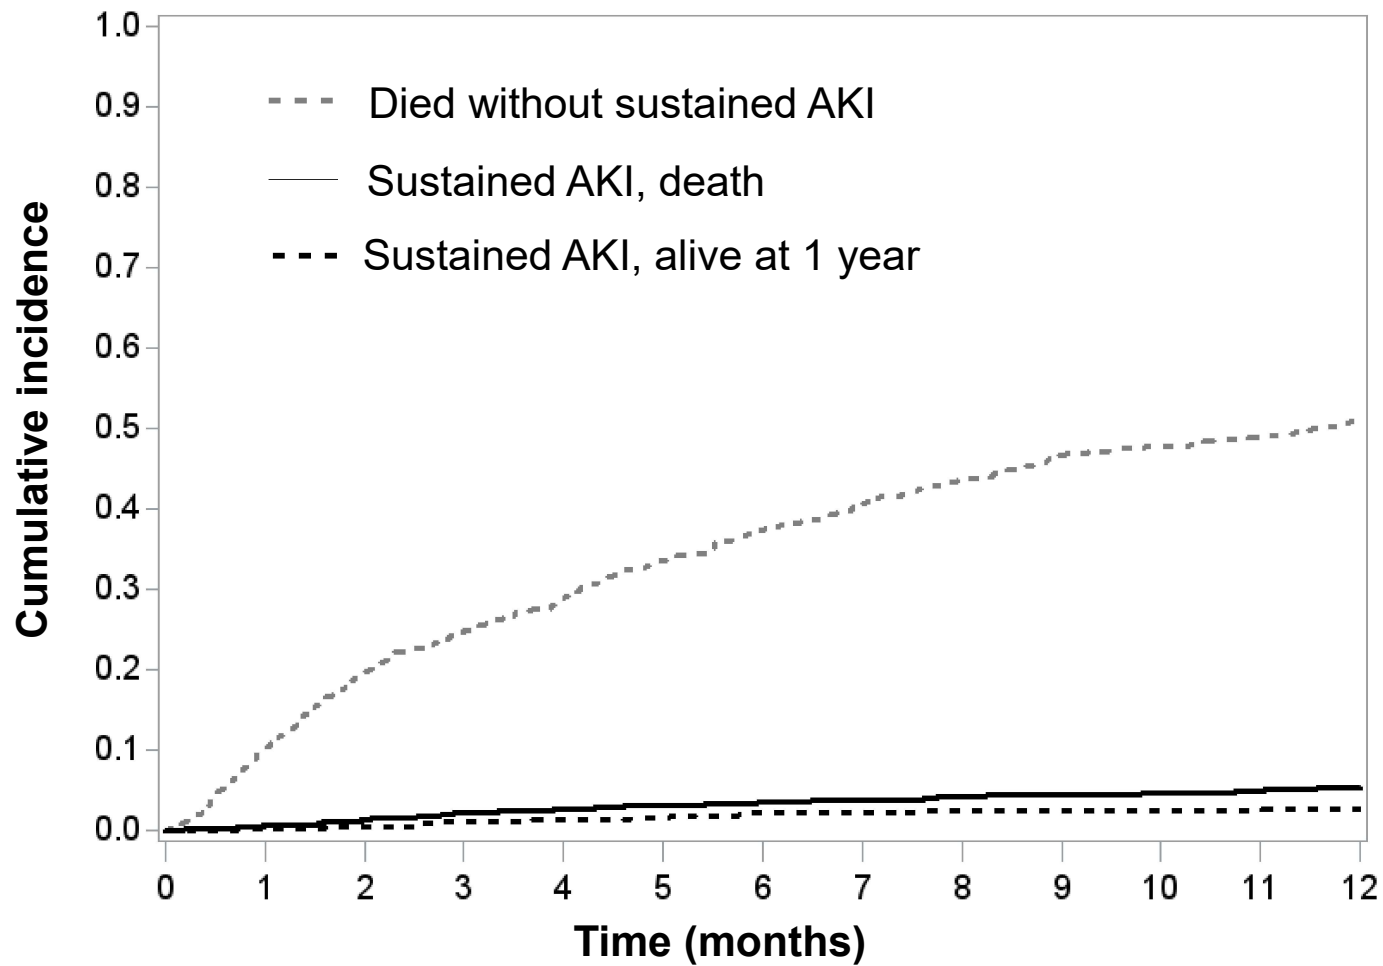

Legend: Patients were censored at the time of sustained AKI or their last serum creatinine measurement.

Abbreviation: AKI = Acute Kidney Injury
